# Supplementary material for: Characterization of Hymenopteran Parasitoids of Aphis fabae in An African Smallholder Bean Farming System Through Sequencing of COI ‘Mini-barcodes’
Source: MDPI journal article supplement (doi:10.3390/insects10100331), 2019-10-02
Supplement: s1 [file s1]

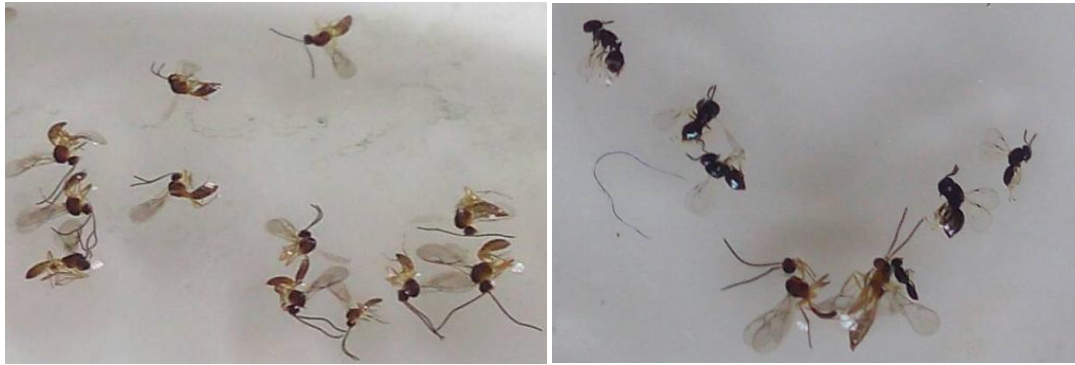

**Figure S1. Parasitoids emerged from sentinel aphids.** Parasitoids emerged from *Aphis fabae*, viewed under a stereo microscope (magnification x25).

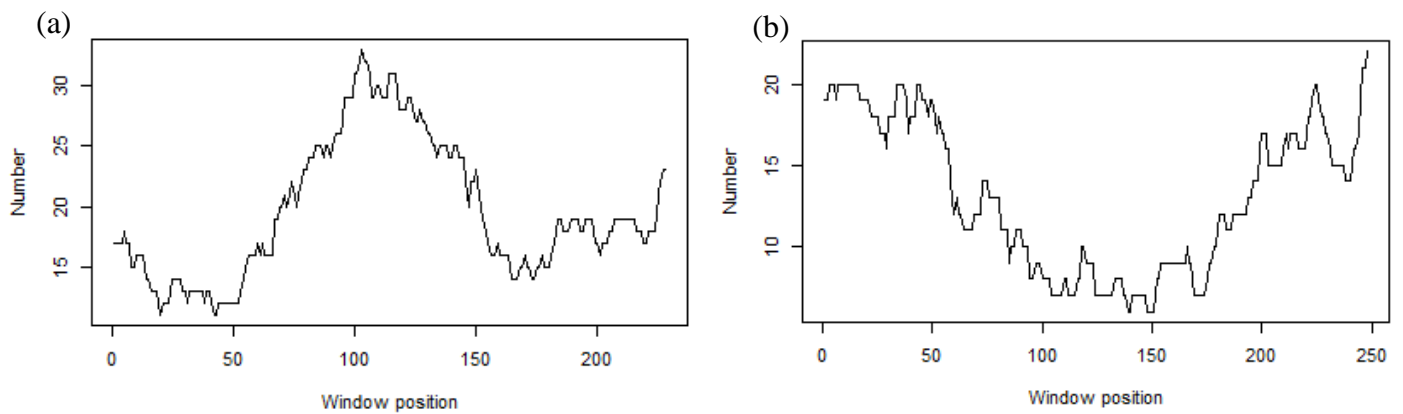

**Figure S2. Sliding window analysis for LepF1/C\_ANTMRID and MLepF1/ LepR1 mini-barcode.** Sum of diagnostic nucleotides in 50 bp windows for mini-barcode LepF1/C\_ANTMRID (a) and MLepF1/ LepR1 (b), when comparing nucleotides from 74 or 67 parasitoid species, respectively (Tables S2 and S3).
